# Supplementary material
Source: PubMed Central journal article supplement (PMC8967620)
Supplement: 7581_2_supp_94746_r20fpb.pdf [file 7581_2_supp_94746_r20fpb.pdf]

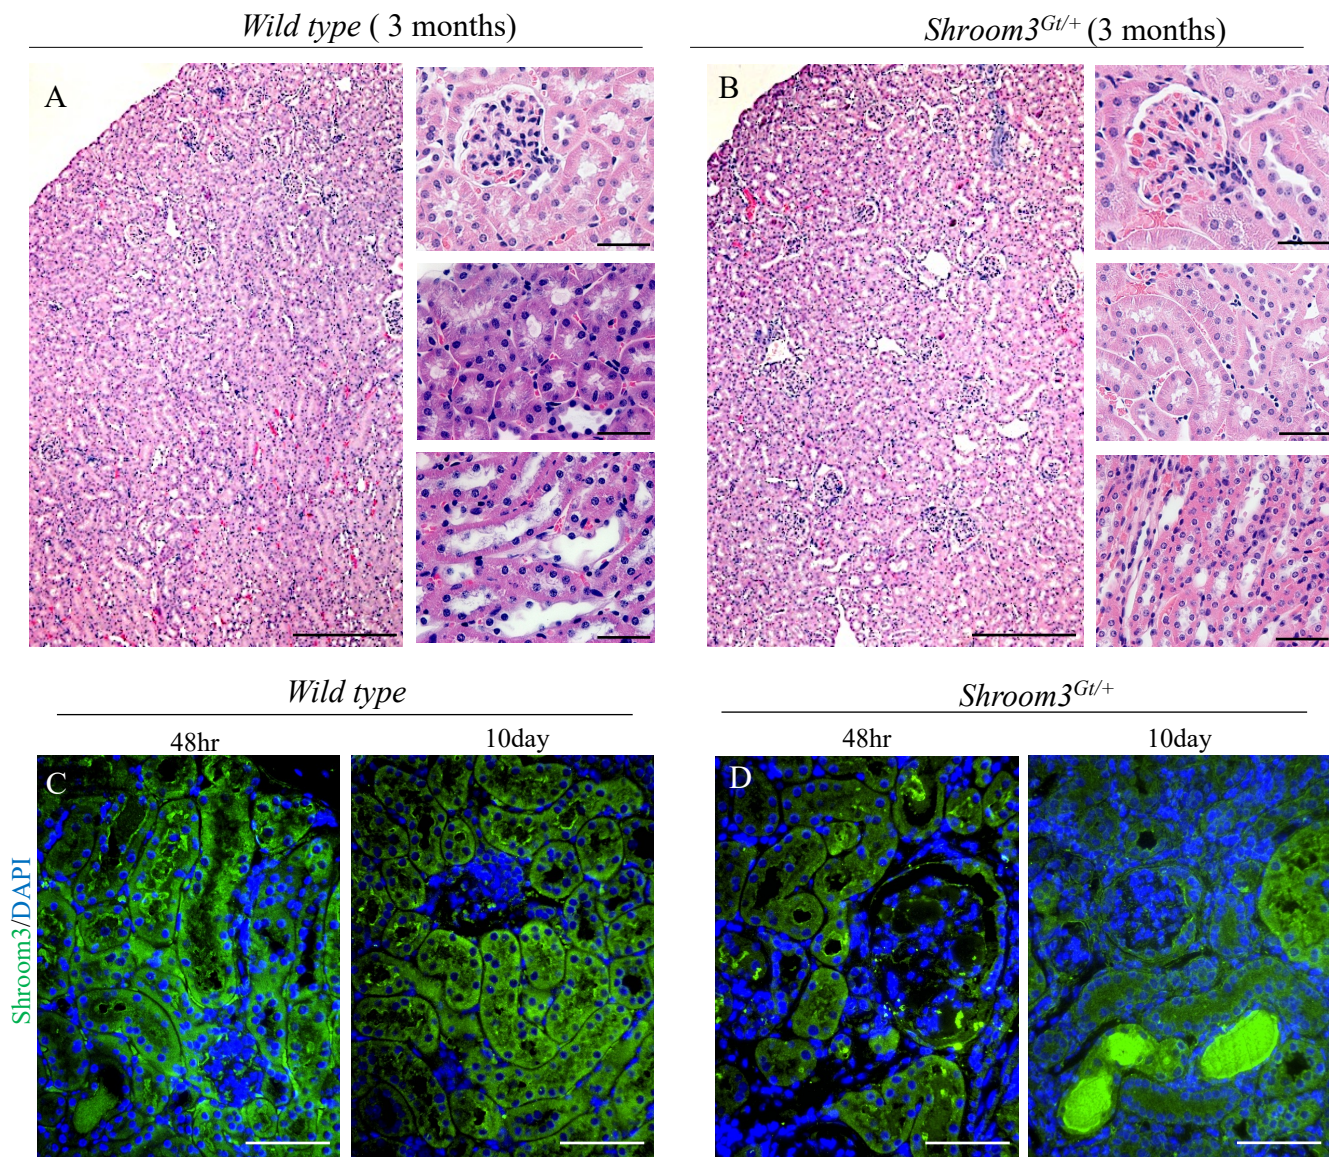

**Supplementary Figure 1. A-B:** Representative low and high-power images of H&E stained *wild type* and *Shroom3*<sup>Gt/+</sup> mutants at 3 months of age. *Shroom3*<sup>Gt/+</sup> mutant mice do not exhibit any overt phenotypic alterations when compared to *wild type* littermates. **C-D:** Immunofluorescence representing Shroom3 protein expression 48 hours and 10 days after IRI. The *wild type* and *Shroom3*<sup>Gt/+</sup> mutants exhibit the same protein expression pattern after acute kidney injury (IRI). No Shroom3 protein expression is observed in the interstitium of *wild type* and *Shroom3*<sup>Gt/+</sup> mutants after IRI. Scale bars: A-B: low-power 400 um, high-power 40 um; C-D: 40 um

*Wild type* SHAM

*Shroom3*<sup>Gt/+</sup> SHAM

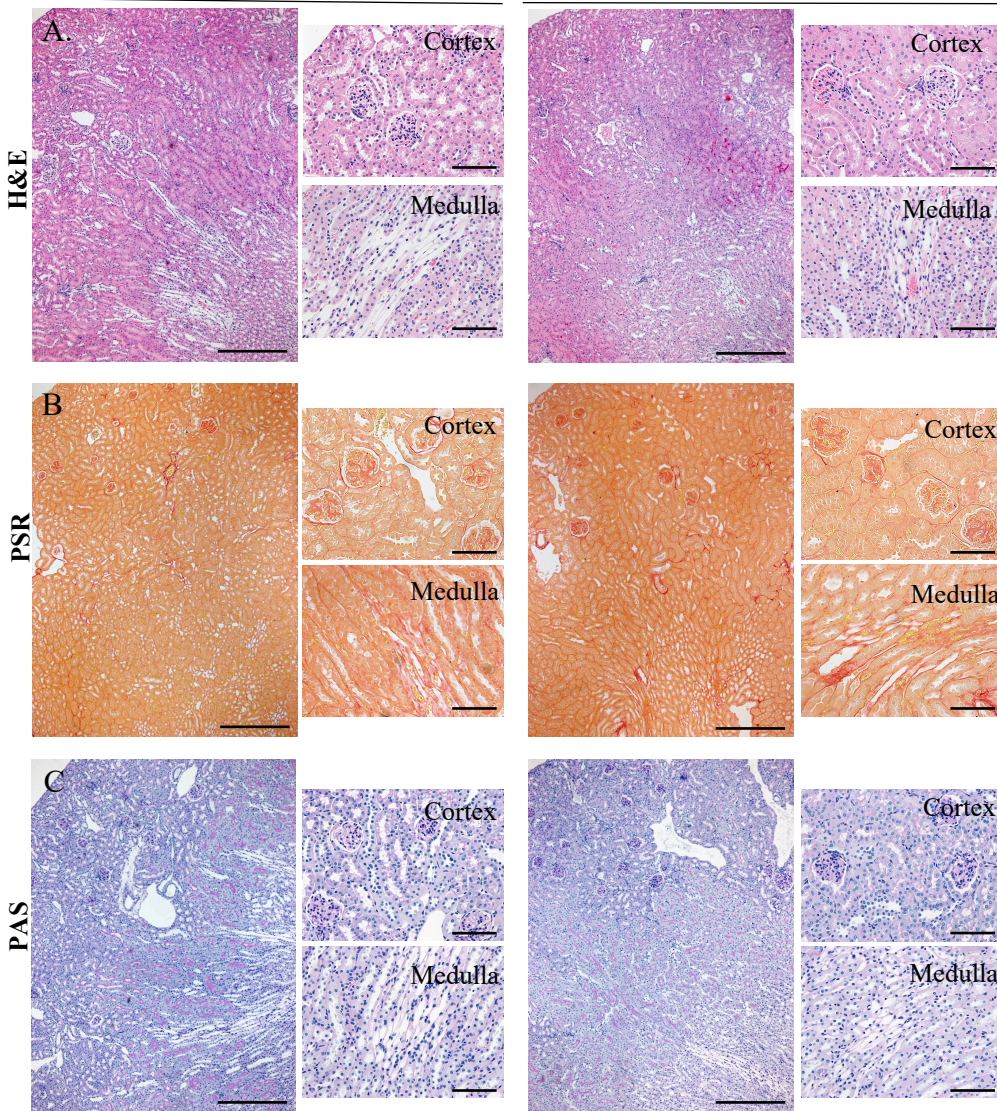

**Supplementary Figure 2. A-C:** Representative low and high-power images of Sham-operated *wild type* and *Shroom3*<sup>Gt/+</sup> mice 48 hours post IRI. No histological abnormalities are observed in **A.** H&E, **B.** PSR. **C.** PAS. This demonstrates the surgical conditions do not alter kidney morphology. Scale bars: A-C: low-power 400 um, high-power 80 um
